# Supplementary material for: Characterizing gaseous peptide structure with action-EET and simulated annealing
Source: Royal Society of Chemistry journal article supplement (doi:10.1039/c5cp01617g), 2015-01-01
Supplement: c5cp01617g1.pdf [file c5cp01617g1.pdf]

Supporting information

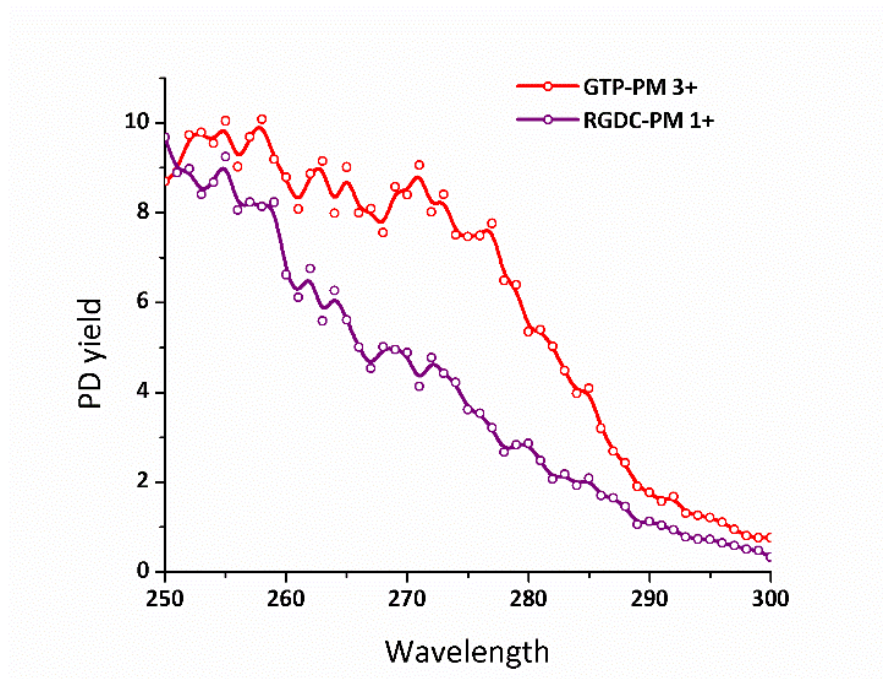

Figure 1: Action-EET spectra of GTP-PM 3+ and RGDC-PM 1+ for comparison

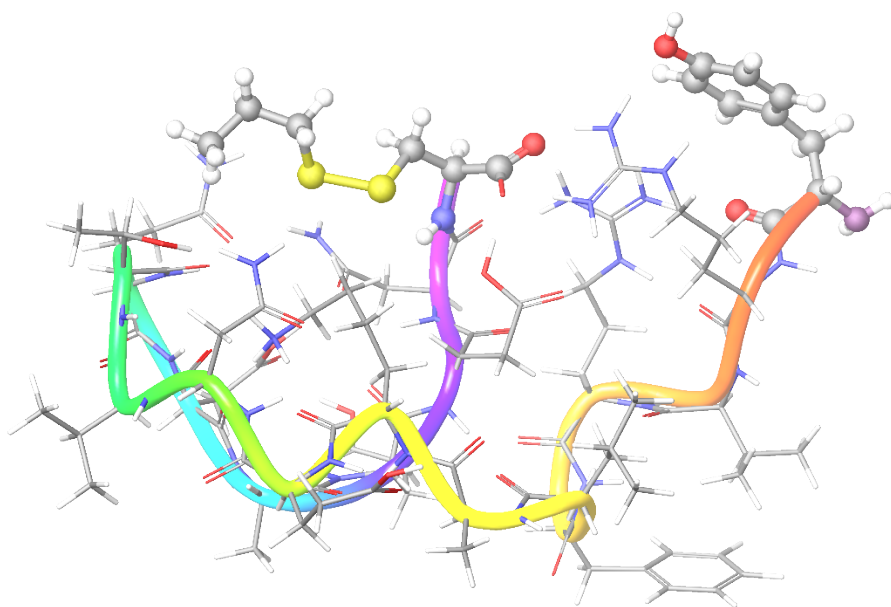

Figure 2: CD36 93-110 2+ LES (R<sub>2</sub>R<sub>4</sub>K<sub>8</sub>C<sub>term</sub>)

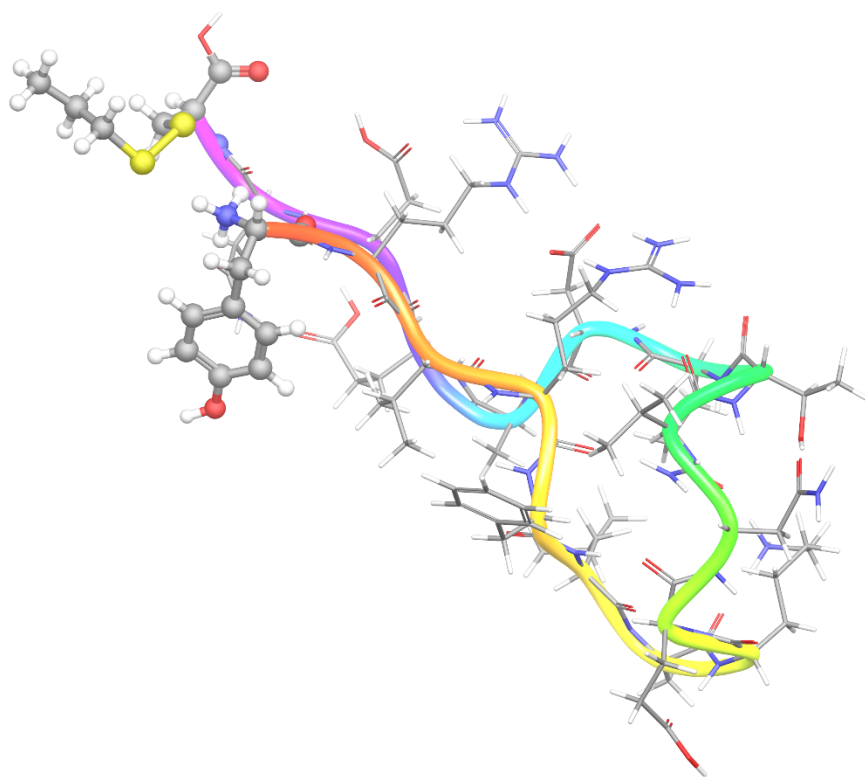

Figure 3: CD36 93-110 3+ (N<sub>term</sub>R<sub>2</sub>R<sub>4</sub>K<sub>8</sub>D<sub>15</sub>) structure from constrained simulated annealing.
